# Supplementary material
Source: HighWire-hosted journal article supplement (https://ejhp.bmj.com/highwire/filestream/155930/field_highwire_adjunct_files/7/ejhpharm-2024-004098supp008_data_supplement.pdf)
Supplement: ejhpharm-2024-004098supp008_data_supplement.pdf [file ejhpharm-2024-004098supp008_data_supplement.pdf]

SUPPLEMENTARY TABLE 2: description of contributions

| Author, year of publication    | Description of the contributions                                                                                                                                                                                                            | Role of the pharmacist |         | Method used |                  |                           |     |                                | Targeted health product |                | Targeted stage in the pharmaceutical circuit |               |               |               |             |
|--------------------------------|---------------------------------------------------------------------------------------------------------------------------------------------------------------------------------------------------------------------------------------------|------------------------|---------|-------------|------------------|---------------------------|-----|--------------------------------|-------------------------|----------------|----------------------------------------------|---------------|---------------|---------------|-------------|
|                                |                                                                                                                                                                                                                                             | Pilot                  | Support | Survey      | Waste collection | Quality management method | LCA | Theoretical/Practical training | Medications             | Medical device | Purchasing/procurement                       | Prescription* | Preparation** | Dispensing*** | Elimination |
| Rouvière <i>et al.</i> , 2022  | Implementation of monthly working group meetings                                                                                                                                                                                            |                        |         |             |                  |                           |     |                                |                         |                |                                              |               |               |               |             |
| [9]                            | Monthly bulletin for raising awareness about eco-health.                                                                                                                                                                                    |                        |         |             |                  |                           |     |                                |                         |                |                                              |               |               |               |             |
|                                | Execution of:<br>- 7 waste reduction actions<br>- 5 waste sorting actions<br>- 1 action on eco-responsible purchasing<br>- Evaluation of cost differences associated with these interventions.                                              | X                      |         | X           | X                |                           | X   | X                              |                         | X              | X                                            |               |               |               | X           |
| Giraud <i>et al.</i> , 2022    | Identification of 30 regulatory and non-regulatory criteria related to the procurement of healthcare products and SD.                                                                                                                       |                        |         |             |                  |                           |     |                                |                         |                |                                              |               |               |               |             |
| [10]                           | Creation of a questionnaire for healthcare product suppliers to assess their level of environmental "maturity."                                                                                                                             | X                      |         | X           |                  |                           |     |                                | X                       | X              | X                                            |               |               |               |             |
|                                | Creation of a questionnaire for healthcare product buyers to assess the integration of SD criteria into their procurement procedures.                                                                                                       |                        |         |             |                  |                           |     |                                |                         |                |                                              |               |               |               |             |
| Singleton <i>et al.</i> , 2022 | Semi-structured interviews with hospital pharmacists conducted by a pharmacist.                                                                                                                                                             |                        |         |             |                  |                           |     |                                |                         |                |                                              |               |               |               |             |
| [11]                           | Topic of the questions: awareness of the existence of NHS SD working groups; barriers to the integration of SD into their decision-making; the pharmacist's role in overcoming these barriers and incorporating SD into clinical decisions. | X                      |         | X           |                  |                           |     |                                | X                       | X              | X                                            | X             |               | X             | X           |
| Mouarbes <i>et al.</i> , 2022  | Creation of a custom pack for anterior cruciate ligament reconstruction surgery.                                                                                                                                                            | X                      |         | X           | X                |                           |     |                                |                         | X              | X                                            |               |               |               | X           |
| [12]                           | Study of the three pillars of SD:                                                                                                                                                                                                           |                        |         |             |                  |                           |     |                                |                         |                |                                              |               |               |               |             |

| Author, year of publication            | Description of the contributions                                                                                                                                                                                                                                                                                                                                                                       | Role of the pharmacist |         | Method used |                  |                           |     |                                | Targeted health product |                | Targeted stage in the pharmaceutical circuit |               |               |               |             |
|----------------------------------------|--------------------------------------------------------------------------------------------------------------------------------------------------------------------------------------------------------------------------------------------------------------------------------------------------------------------------------------------------------------------------------------------------------|------------------------|---------|-------------|------------------|---------------------------|-----|--------------------------------|-------------------------|----------------|----------------------------------------------|---------------|---------------|---------------|-------------|
|                                        |                                                                                                                                                                                                                                                                                                                                                                                                        | Pilot                  | Support | Survey      | Waste collection | Quality management method | LCA | Theoretical/Practical training | Medications             | Medical device | Purchasing/procurement                       | Prescription* | Preparation** | Dispensing*** | Elimination |
|                                        | 1- Environmental: assessment of the difference in weight and the quantity of waste related to the surgical equipment.<br>2- Social: calculation of the difference in equipment preparation time; analysis of musculoskeletal disorder factors; surgeon satisfaction survey regarding the implementation of the custom pack.<br>3- Economic: evaluation of the cost difference of the instruments used. |                        |         |             |                  |                           |     |                                |                         |                |                                              |               |               |               |             |
| Leraut <i>et al.</i> , 2022<br>[13]    | Qualitative and quantitative analysis of medications administered through an inhaler in urban and HF.<br><br>Literature review to extract the carbon footprints per inhaler-administered medication box.                                                                                                                                                                                               | X                      |         |             |                  |                           | X   |                                | X                       |                |                                              |               |               | X             |             |
| Mohammed <i>et al.</i> , 2021<br>[14]  | Inventory of returned/wasted healthcare products in HF.<br><br>Creation of a questionnaire for pharmacy staff, divided into two parts:<br>1- Sociodemographic data<br>2- Pharmaceutical waste disposal methods.                                                                                                                                                                                        | X                      |         | X           |                  |                           |     |                                | X                       | X              |                                              |               |               |               | X           |
| Barbariol <i>et al.</i> , 2021<br>[15] | Literature review and preliminary study to select the most wasted medications (selection of 11 medications).<br><br>Recording of the preparation and administration time of medication syringes by nurses.<br><br>Inventory of the number of wasted syringes (prepared but ultimately not administered).<br><br>Estimating the cost of wastage.                                                        |                        | X       |             | X                |                           |     |                                | X                       |                |                                              |               | X             |               | X           |
| Gidey <i>et al.</i> , 2020<br>[16]     | A pharmacy student conducted interviews with patients collecting treatments from the hospital pharmacy.                                                                                                                                                                                                                                                                                                | X                      |         | X           |                  |                           |     |                                | X                       |                |                                              |               |               |               | X           |

| Author, year of publication        | Description of the contributions                                                                                                                    | Role of the pharmacist |         | Method used |                  |                           |     |                                | Targeted health product |                | Targeted stage in the pharmaceutical circuit |               |               |               |             |
|------------------------------------|-----------------------------------------------------------------------------------------------------------------------------------------------------|------------------------|---------|-------------|------------------|---------------------------|-----|--------------------------------|-------------------------|----------------|----------------------------------------------|---------------|---------------|---------------|-------------|
|                                    |                                                                                                                                                     | Pilot                  | Support | Survey      | Waste collection | Quality management method | LCA | Theoretical/Practical training | Medications             | Medical device | Purchasing/procurement                       | Prescription* | Preparation** | Dispensing*** | Elimination |
|                                    | Creation of a 2-part questionnaire:<br>1- Sociodemographic data<br>2- Knowledge of how to dispose of unused and out-of-date medicines.              |                        |         |             |                  |                           |     |                                |                         |                |                                              |               |               |               |             |
| Alhomoud, 2020<br>[17]             | Creation of a questionnaire assessing the feasibility and importance of activities that could be implemented by pharmacists to reduce drug wastage. | X                      |         | X           |                  |                           |     |                                | X                       |                | X                                            | X             | X             | X             | X           |
| Tsang <i>et al.</i> , 2019<br>[18] | Overview of the most commonly used refrigerated medicines in the OR.                                                                                |                        |         |             |                  |                           |     |                                |                         |                |                                              |               |               |               |             |
|                                    | Twice-weekly reminders of the procedure for returning unused medicines to the pharmacy by e-mail and verbally.                                      |                        |         |             |                  |                           |     |                                |                         |                |                                              |               |               |               |             |
|                                    | Provision of the most commonly used refrigerated medicines directly in mini-fridges in the ORs.                                                     | X                      |         |             | X                |                           |     | X                              | X                       |                |                                              |               |               | X             | X           |
| Lin <i>et al.</i> , 2018<br>[19]   | Collection by pharmacy assistants of medicines intended for disposal and calculation of associated costs. Collected before and after the operation. |                        |         |             |                  |                           |     |                                |                         |                |                                              |               |               |               |             |
|                                    | Mapping of intravenous pharmaceutical compounding production flows to identify non- value-added tasks.                                              |                        |         |             |                  |                           |     |                                |                         |                |                                              |               |               |               |             |
|                                    | Increasing the production frequency of pharmaceutical compounding batches from 3 to 5 batches per day.                                              | X                      |         |             | X                | X                         |     |                                | X                       |                |                                              |               | X             |               |             |
|                                    | Increased use of already reconstituted medicines.                                                                                                   |                        |         |             |                  |                           |     |                                |                         |                |                                              |               |               |               |             |
|                                    | Identify the number of doses wasted (dispensed but not administered) and calculate the associated costs.                                            |                        |         |             |                  |                           |     |                                |                         |                |                                              |               |               |               |             |

| Author, year of publication             | Description of the contributions                                                                                                                                                                                                                                                                                                                                                            | Role of the pharmacist |         | Method used |                  |                           |     |                                | Targeted health product |                | Targeted stage in the pharmaceutical circuit |               |               |               |             |
|-----------------------------------------|---------------------------------------------------------------------------------------------------------------------------------------------------------------------------------------------------------------------------------------------------------------------------------------------------------------------------------------------------------------------------------------------|------------------------|---------|-------------|------------------|---------------------------|-----|--------------------------------|-------------------------|----------------|----------------------------------------------|---------------|---------------|---------------|-------------|
|                                         |                                                                                                                                                                                                                                                                                                                                                                                             | Pilot                  | Support | Survey      | Waste collection | Quality management method | LCA | Theoretical/Practical training | Medications             | Medical device | Purchasing/procurement                       | Prescription* | Preparation** | Dispensing*** | Elimination |
| Bekker <i>et al.</i> , 2018<br>[20]     | Creation of an open online questionnaire to list waste reduction activities implemented by pharmacists.<br><br>Creation of a second questionnaire to assess the importance and feasibility of these activities.                                                                                                                                                                             | X                      |         | X           |                  |                           |     |                                | X                       |                | X                                            | X             | X             | X             | X           |
| Abbasi <i>et al.</i> , 2017<br>[21]     | Counting the number of sterile pharmaceutical compounding returned to the pharmacy because they were not administered to patients within the allotted time.<br><br>Increase in the frequency of production of batches of pharmaceutical compounding, from 2 batches to 4 batches per day.                                                                                                   | X                      |         |             |                  | X                         |     |                                | X                       |                |                                              |               | X             |               |             |
| Furukawa <i>et al.</i> , 2016<br>[22]   | Using quality tools to analyse the healthcare product distribution circuit: process mapping with problem identification, brainstorming, the five whys, impact/effort matrix.<br><br>Applying the Lean Six Sigma method to leverage the results of quality tools.<br><br>Developing an action plan describing the actions to be implemented, the stakeholders, and the completion deadlines. | X                      |         |             | X                | X                         |     | X                              | X                       | X              |                                              | X             |               | X             | X           |
| Al-Shareef <i>et al.</i> , 2016<br>[23] | Creation of a questionnaire in three parts:<br>1- Demographic data<br>2- Quantification and characterisation of expired and unused medications at home<br>3- Attitude and method of disposing of these medications                                                                                                                                                                          | X                      |         | X           |                  |                           |     |                                | X                       |                |                                              |               |               |               | X           |

| Author, year of publication        | Description of the contributions                                                                                                | Role of the pharmacist |         | Method used |                  |                           |         |                                | Targeted health product |                | Targeted stage in the pharmaceutical circuit |               |               |               |             |
|------------------------------------|---------------------------------------------------------------------------------------------------------------------------------|------------------------|---------|-------------|------------------|---------------------------|---------|--------------------------------|-------------------------|----------------|----------------------------------------------|---------------|---------------|---------------|-------------|
|                                    |                                                                                                                                 | Pilot                  | Support | Survey      | Waste collection | Quality management method | LCA     | Theoretical/Practical training | Medications             | Medical device | Purchasing/procurement                       | Prescription* | Preparation** | Dispensing*** | Elimination |
| Mosquera <i>et al.</i> , 2014 [24] | Theoretical training sessions on the disposal of healthcare waste in various areas, including pharmacy.                         |                        |         |             |                  |                           |         |                                |                         |                |                                              |               |               |               |             |
|                                    | Pre-training assessment of healthcare waste management in each department.                                                      |                        | X       |             | X                |                           |         | X                              | X                       | X              |                                              |               |               |               | X           |
|                                    | Weighing of care waste before and after the operation.                                                                          |                        |         |             |                  |                           |         |                                |                         |                |                                              |               |               |               |             |
|                                    | Sending an improvement report to each department with waste sorting recommendations                                             |                        |         |             |                  |                           |         |                                |                         |                |                                              |               |               |               |             |
| Toerper <i>et al.</i> , 2014 [25]  | Creation of 108 different production schedules varying the preparation frequency, preparation schedules, and preparation times. | X                      |         |             |                  | X                         |         |                                | X                       |                |                                              |               | X             |               |             |
|                                    | Implementation of the ideal calendar.                                                                                           |                        |         |             |                  |                           |         |                                |                         |                |                                              |               |               |               |             |
| Total                              |                                                                                                                                 | n= 15 (88%)            | 2 (11%) | 9 (52%)     | 7 (41%)          | 4 (23%)                   | 2 (11%) | 4 (23%)                        | 15 (88%)                | 7 (41%)        | 6 (35%)                                      | 4 (23%)       | 5 (29%)       | 6 (35%)       | 12 (70%)    |

\* Prescription (prescription receipt, prescription validation)

\*\* Preparation: pharmaceutical compounding, dosage form *on demand*

\*\*\* Dispensing/distribution of care services
